# Supplementary material
Source: Elsevier journal article supplement (https://www.sciencedirect.com/science/article/pii/S0025775321000920)
Supplement: mmc1 [file S0025775321000920:mmc1.doc]

**Supplementary Table 1:** Differences in baseline characteristics between patients with and without available hs-TnI determinations.

Abbreviatures: TIA transient ischemic attack, CKD chronic kidney disease, PAD peripheral artery disease, COPD chronic pulmonary obstructive disease, SBP systolic blood pressure, CRP C-reactive protein

| Variable | All patients  (n=3042) | No hs-TnI determinations available  (n=2124) | hs-TnI determinations available (n=918) | p value |
| --- | --- | --- | --- | --- |
| Age (years) | 62.3 ± 20.3 | 61.9 ± 22.0 | 63.2 ± 15.5 | 0.111 |
| Male sex (%) | 1670 (54.9) | 1118 (52.6) | 552 (60.1) | <0.001 |
| Time symptoms-diagnosis (days) | 6.2 ± 5.3 | 6.0 ± 5.1 | 6.7 ± 5.7 | 0.001 |
| Hypertension (%) | 1309 (43.0) | 906 (42.7) | 403 (43.9) | 0.527 |
| Diabetes (%) | 556 (18.3) | 371 (17.5) | 185 (20.2) | 0.077 |
| Dyslipidemia (%) | 1090 (35.8) | 733 (34.5) | 357 (38.9) | 0.033 |
| Coronary heart disease (%) | 196 (3.4) | 130 (6.1) | 66 (7.2) | 0.261 |
| Heart Failure (%) | 150 (4.9) | 118 (5.6) | 32 (3.5) | 0.016 |
| Atrial fibrillation (%) | 249 (8.2) | 190 (9.0) | 59 (6.4) | 0.020 |
| TIA/Stroke (%) | 185 (6.1) | 144 (6.8) | 41 (4.5) | 0.016 |
| CKD (%) | 179 (5.9) | 128 (6.0) | 51 (5.6) | 0.612 |
| PAD (%) | 197 (6.5) | 128 (6.0) | 69 (7.5) | 0.121 |
| EPOC (%) | 234 (7.7) | 174 (8.2) | 60 (6.5) | 0.116 |
| SBP (mmHg) at admission | 129.0 ± 21.4 | 129.5 ± 22.0 | 128.0 ± 20.4 | 0.113 |
| SatO2 (%) at admission | 92.2 ± 6.2 | 92.6 ± 6.1 | 91.4 ± 6.3 | <0.001 |
| CRP (max) | 131.7 ± 109.1 | 111.4 ± 97.9 | 166.0 ± 118.3 | <0.001 |
| Fibrinogen (max) | 820.7 ± 281.4 | 772.1 ± 274.6 | 904.3 ± 273.3 | <0.001 |
| Prothrombin act. (min) | 81.3 ± 24.2 | 83.7 ± 23.9 | 77.2 ± 24.2 | <0.001 |
| D-Dimer (max) | 9390.6 ± 32619.6 | 4537.4 ± 18252.6 | 15194.7 ± 43330.8 | <0.001 |
| Hydroxychloroquine (%) | 2361 (77.6) | 1491 (70.2) | 870 (94.8) | <0.001 |
| Lopinavir/Ritonavir (%) | 319 (10.5) | 206 (9.7) | 13 (12.3) | 0.031 |
| Azithromycin (%) | 1390 (45.7) | 785 (37.0) | 605 (65.9) | <0.001 |
| Corticosteroids (%) | 440 (14.5) | 176 (8.3) | 264 (28.8) | <0.001 |

**Supplementary Table 2:** Differences in baseline characteristics between different quartiles of hs-TnI.

|  | All patients  (n=918) | hsTnI < LD  (n=230) | First quartile  (n=175) | Second quartile (n=169) | Third quartile  (n=172) | Fourth quartile  (n=172) | p value |
| --- | --- | --- | --- | --- | --- | --- | --- |
| Age (years) | 63.2 ± 15.5 | 51.9 ± 13.8 | 61.3 ± 13.6 | 66.4 ± 14.3 | 70.7 ± 13.4 | 69.7 ± 13.4 | <0.001 |
| Male sex (%) | 552 (60.1) | 107 (46.5) | 112 (64.0) | 100 (59.2) | 119 (69.2) | 114 (66.3) | <0.001 |
| Time symptoms-diagnosis (days) | 6.7 ± 5.7 | 7.2 ± 6.2 | 6.8 ± 4.5 | 7.2 ± 6.4 | 6.1 ± 4.9 | 6.1 ± 6.0 | 0.212 |
| Hypertension (%) | 403 (43.9) | 53 (23.0%) | 67 (38.3) | 87 (51.5) | 103 (59.9) | 93 (54.1) | <0.001 |
| Diabetes (%) | 185 (20.2) | 24 (10.4) | 26 (14.9) | 48 (28.4) | 42 (24.4) | 45 (26.2) | <0.001 |
| Dyslipidemia (%) | 357 (38.9) | 44 (19.1) | 72 (41.1) | 77 (45.6) | 81 (47.1) | 83 (48.3) | <0.001 |
| Coronary heart disease (%) | 66 (7.2) | 4 (1.7) | 9 (5.1) | 14 (8.3) | 20 (11.6) | 19 (11.1) | <0.001 |
| Heart Failure (%) | 32 (3.5) | 1 (0.4) | 2 (1.1) | 6 (3.6) | 10 (5.8) | 13 (7.6) | <0.001 |
| Atrial fibrillation (%) | 59 (6.4) | 2 (0.9) | 7 (4.0) | 10 (5.9) | 17 (9.9) | 23 (13.4) | <0.001 |
| TIA/Stroke (%) | 41 (4.5) | 1 (0.4) | 2 (1.1) | 10 (5.9) | 13 (7.6) | 15 (8.7) | <0.001 |
| CKD (%) | 51 (5.6) | 1 (0.4) | 3 (1.7) | 17 (10.1) | 18 (10.5) | 12 (7.0) | <0.001 |
| PAD (%) | 69 (7.5) | 4 (1.7) | 9 (5.1) | 10 (5.9) | 25 (14.5) | 21 (12.2) | <0.001 |
| EPOC (%) | 60 (6.5) | 5 (2.2) | 8 (4.6) | 10 (5.9) | 24 (14.0) | 3 (7.6) | <0.001 |
| SBP (mmHg) at admission | 128.0 ± 20.4 | 126.2 ± 18.2 | 127.6 ± 18.2 | 129.6 ± 19.5 | 130.0 ± 22.1 | 127.0 ± 23.2 | 0.363 |
| SatO2 (%) at admission | 91.4 ± 6.3 | 93.5 ± 3.8 | 92.5 ± 4.5 | 91.3 ± 5.4 | 90.6 ± 5.3 | 88.6 ± 9.9 | <0.001 |
| hs-TnI (max) | 620.6 ± 6188.7 | N/A | 3.9 ± 0.9 | 8.5 ± 2.2 | 27.2 ± 12.1 | 2443.0 ± 12223.6 | <0.001 |
| CRP (max) | 166.0 ± 118.3 | 109.5 ± 97.9 | 143.5 ± 101.3 | 153.9 ± 102.9 | 190.3 ± 10.1 | 252.9 ± 126.8 | <0.001 |
| Fibrinogen (max) | 904.3 ± 272.3 | 826.2 ± 288.3 | 894.8 ± 261.4 | 905.9 ± 262.1 | 919.5 ± 257.9 | 1000.9 ± 260.5 | <0.001 |
| Prothrombin act. (min) | 77.2 ± 24.2 | 90.6 ±16.3 | 83.5 ± 20.4 | 78.0 ± 23.6 | 71.5 ± 23.1 | 57.7 ± 24.5 | <0.001 |
| D-Dimer (max) | 15194.7 ± 43330.8 | 2474 ± 6248 | 3731 ± 7568 | 6151 ± 20614 | 18147 ± 35874 | 49570 ± 81343 | <0.001 |
| Hydroxychloroquine (%) | 870 (94.8) | 210 (91.3) | 169 (96.6) | 161 (95.3) | 164 (95.4) | 166 (96.5) | 0.131 |
| Lopinavir/Ritonavir (%) | 113 (12.3) | 31 (13.5) | 14 (8.0) | 16 (9.5) | 22 (12.8) | 30 (17.4) | 0.066 |
| Azithromycin (%) | 605 (65.9) | 133 (57.8) | 120 (68.6) | 122 (72.2) | 113 (65.7) | 117 (68.0) | 0.032 |
| Corticosteroids (%) | 264 (28.8) | 22 (9.6) | 9 (16.6) | 48 (28.4) | 67 (39.0) | 98 (57.0) | <0.001 |

Abbreviatures: Same as Supplementary 1.

**Supplementary Table 3:** Differences in clinical outcomes between different quartiles of hs-TnI.

Abbreviatures: PE pulmonary embolism, DVT deep vein thrombosis, ACS acute coronary syndrome, TIA transient ischemic attack, PAD peripheral artery disease.

| Variable | All patients  (n=918) | hsTnI < LD  (n=230) | First quartile  (n=175) | Second quartile (n=169) | Third quartile  (n=172) | Fourth quartile  (n=172) | p value |
| --- | --- | --- | --- | --- | --- | --- | --- |
| PE (%) | 59 (6.4) | 4 (1.7) | 6 (3.4) | 7 (4.1) | 12 (7.0) | 30 (17.4) | <0.001 |
| DVT (%) | 12 (1.3) | 2 (0.9) | 1 (0.6) | 1 (0.6) | 4 (2.3) | 4 (2.3) | 0.409 |
| ACS (%) | 5 (0.5) | 5 (0.5) | 0 (0.0) | 0 (0.0) | 1 (0.6) | 4 (2.3) | 0.009 |
| TIA/Stroke (%) | 10 (1.1) | 2 (0.9) | 1 (0.6) | 0 (0.0) | 3 (1.7) | 4 (2.3) | 0.244 |
| PAD (%) | 9 (1.0) | 1 (0.4) | 1 (0.6) | 0 (0.0) | 2 (1.1) | 5 (2.9) | 0.066 |
| Major bleeding (%) | 16 (1.7) | 1 (0.4) | 1 (0.6) | 1 (0.6) | 4 (2.3) | 9 (5.2) | 0.003 |
| Arrhythmias (%) | 76 (8.3) | 3 (1.3) | 2 (1.1) | 10 (5.9) | 19 (11.1) | 42 (24.4) | <0.001 |
| Heart Failure (%) | 36 (3.9) | 1 (0.4) | 1 (0.6) | 6 (3.6) | 12 (7.0) | 16 (9.30) | <0.001 |
| Mechanical ventilation (%) | 155 (16.9) | 3 (1.3) | 4 (2.3) | 16 (9.5) | 38 (22.1) | 94 (54.7) | <0.001 |
| Death (%) | 184 (20.0) | 5 (2.2) | 6 (3.4) | 20 (11.8) | 58 (33.7) | 95 (55.2) | <0.001 |

**Supplementary Figure 1**


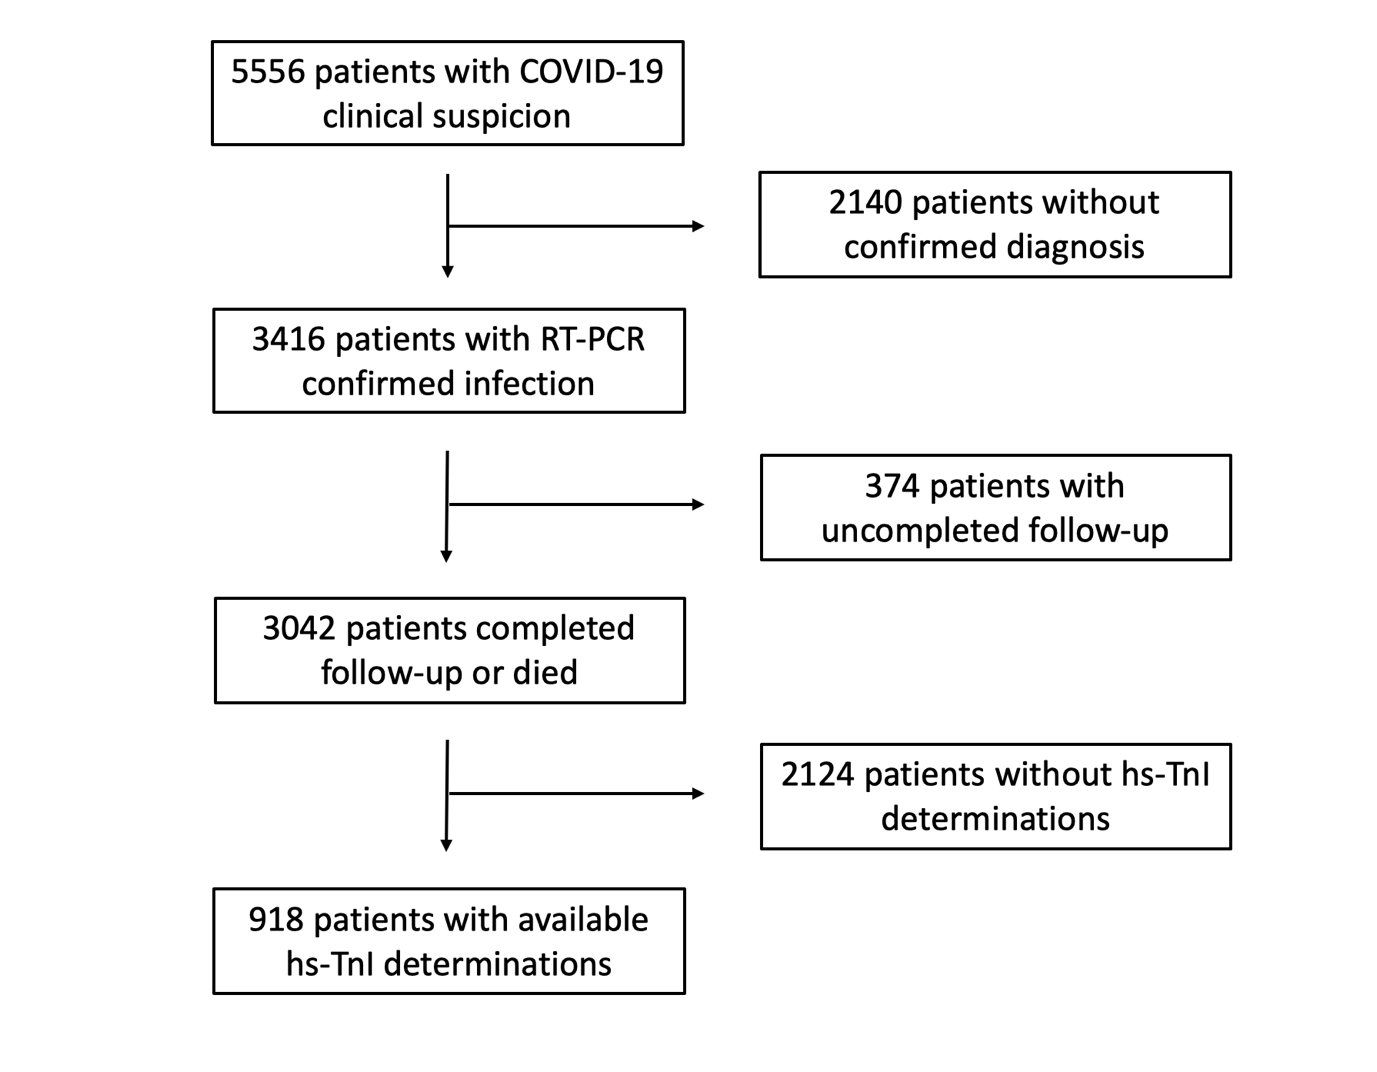


Flow chart of the study population. 5556 consecutive patients with clinical suspicion of COVID-19 disease were screened, of whom 3416 patients had confirmed SARS-CoV-2 infection. Of these, 918 fulfilled all the selection criteria and were ultimately included.

**Supplementary Figure 2**


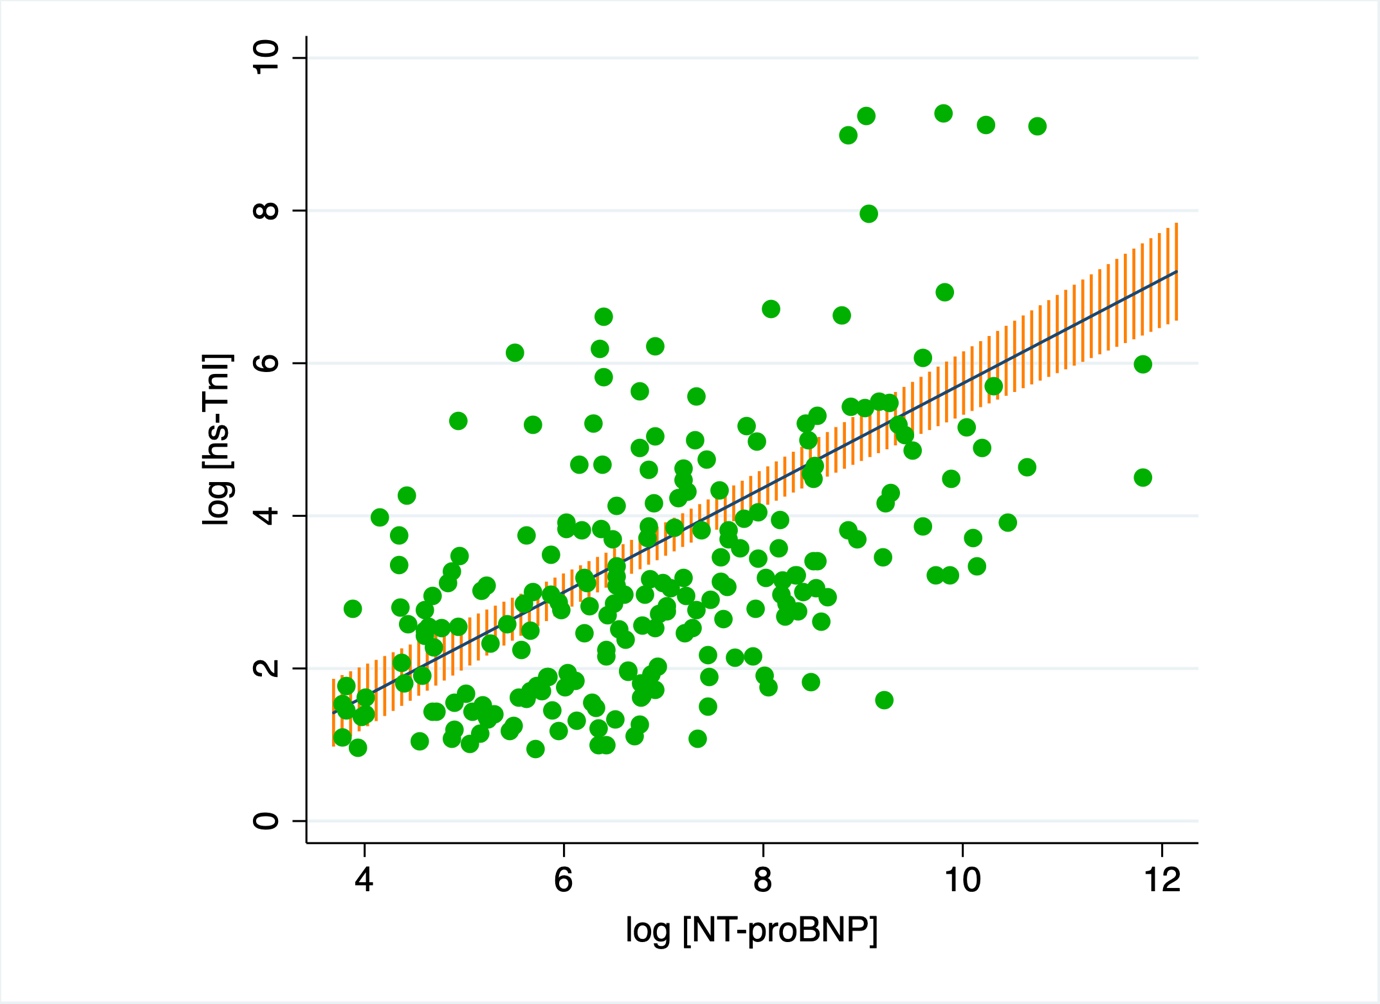


Dot plot showing the correlation between logarithmic concentrations of hs-TnI and NT-proBNP.

**Complete list of contributors (CARD-COVID investigators)**

Cardiology Department

Jose L. Merino, MD, PhD, FEHRA

Juan Caro-Codon, MD

Sergio Castrejon-Castrejon, MD

Angel M. Iniesta, MD

Marcel Martinez-Cossiani, MD

Carlos Merino, MD

Lorena Martin-Polo

Luis A. Martinez, MD

Irene Marco, MD

Jose M. Garcia-Veas, MD

Laura Rodriguez-Sotelo, MD

Sandra O. Rosillo, MD

Jose L. Lopez-Sendon, MD, PhD

Juan R. Rey, MD

Internal Medicine Department

Juan Jose Rios, MD

Jose R. Arribas, MD, PhD

Francisco Arnalich, MD, PhD

Pneumology Department

Concepción Prados, MD, PhD

Rodolfo Alvarez-Sala, MD, PhD

Intensive Care Unit

Manuel Quintana, MD

Abelardo García de Lorenzo, MD PhD

Anesthesiology

Francisco Reinoso, MD, PhD

Emergency Department

Angelica Rivera, MD

Rosario M. Torres, MD

Microbiology Department

Julio Garcia-Rodriguez, MD

Pharmacology Department

Luis Gonzalez-Valle, MD

Alicia Herrero, MD

Alberto Borobia, MD

Central Laboratory

Antonio Buño, MD
